# Supplementary material for: Innate immunity plays a key role in controlling viral load in COVID-19: mechanistic insights from a whole-body infection dynamics model
Source: bioRxiv or medRxiv preprint supplement (doi:10.1101/2020.10.30.20215335), 2020-11-05
Supplement: Supplementary file [file media-1.pdf]

## Supporting Information

### **Innate immunity plays a key role in controlling viral load in COVID-19: mechanistic insights from a whole-body infection dynamics model**

Prashant Dogra<sup>1,\*</sup>, Javier Ruiz-Ramírez<sup>1,†</sup>, Kavya Sinha<sup>2,†</sup>, Joseph D. Butner<sup>1,†</sup>, Maria J Peláez<sup>1</sup>, Manmeet Rawat<sup>3</sup>, Venkata K. Yellepeddi<sup>4,5</sup>, Renata Pasqualini<sup>6</sup>, Wadih Arap<sup>7</sup>, H. Dirk Sostman<sup>8,9,10</sup>, Vittorio Cristini<sup>1</sup>, Zhihui Wang<sup>1,\*</sup>

<sup>1</sup>Mathematics in Medicine Program, Houston Methodist Research Institute, Houston, TX 77030, USA

<sup>2</sup>DeBakey Heart and Vascular Center, Houston Methodist Hospital, Houston, TX 77030, USA

<sup>3</sup>Department of Internal Medicine, University of New Mexico School of Medicine, Albuquerque, NM 87131, USA

<sup>4</sup>Division of Clinical Pharmacology, Department of Pediatrics, School of Medicine, University of Utah, Salt Lake City, UT 84132, USA

<sup>5</sup>Department of Pharmaceutics and Pharmaceutical Chemistry, College of Pharmacy, University of Utah, Salt Lake City, UT 84112, USA

<sup>6</sup>Department of Radiation Oncology, Division of Cancer Biology, Rutgers Cancer Institute of New Jersey, Rutgers New Jersey Medical School, Newark, NJ, 07103 USA

<sup>7</sup>Department of Medicine, Division of Hematology/Oncology, Rutgers Cancer Institute of New Jersey, Rutgers New Jersey Medical School, Newark, NJ, 07103 USA

<sup>8</sup>Weill Cornell Medicine, New York, NY 10065, USA

<sup>9</sup>Houston Methodist Research Institute, Houston, TX 77030, USA

<sup>10</sup>Houston Methodist Academic Institute, Houston, TX 77030, USA

†Equal contribution

**Short title:** A multiscale COVID-19 model

**Keywords:** COVID-19, SARS-CoV-2, mathematical modeling, viral dynamics, pharmacokinetics, in silico clinical trials

\*Correspondence should be sent to:

Zhihui Wang, PhD

Email: [zwang@houstonmethodist.org](mailto:zwang@houstonmethodist.org)

Or,

Prashant Dogra, PhD

Email: [pdogra@houstonmethodist.org](mailto:pdogra@houstonmethodist.org)

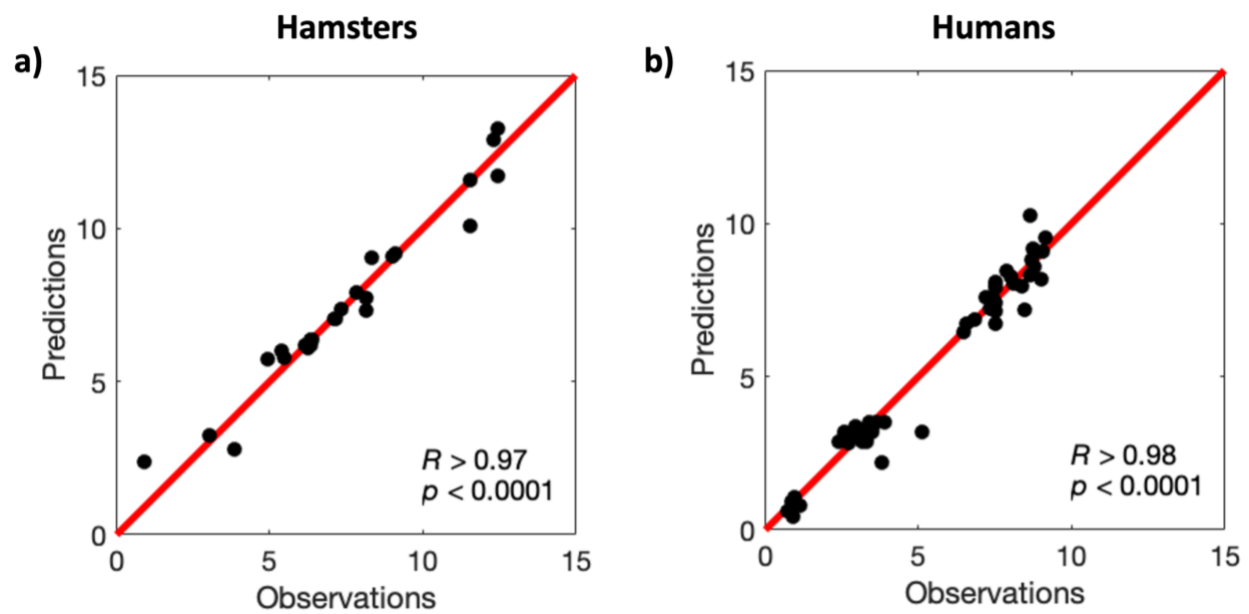

**Figure S1. Pearson correlation of model predictions to experimental data for a) hamsters and b) humans.**
